# Supplementary material
Source: PubMed Central journal article supplement (PMC4085520)
Supplement: cmi201422x1.pdf [file cmi201422x1.pdf]

**Supplemental Table 1 The primers of TRBV family and TRBC1 and GAPDH**

| <i>Family</i>   | <i>Primer</i>             |
|-----------------|---------------------------|
| TRBV 1          | gcacaacagttccctgacttgac   |
| TRBV 2          | tcatcaacctgcaagcctgacct   |
| TRBV 3          | gtctctagagagaagaaggag cgc |
| TRBV 4          | acatatgagagtggattgtcatt   |
| TRBV 5.1        | atacttcagtgagacacagagaaac |
| TRBV 5.2        | tccctaactatagctctgagctg   |
| TRBV 6          | aggcctgagggatccgtctc      |
| TRBV 7          | cctgaatgccccaacagctctc    |
| TRBV 8          | attactttaacaacaacgttccg   |
| TRBV 9          | cctaaatctccagacaagctcac   |
| TRBV 10         | ctcaaaaactatcctgtacctt    |
| TRBV 11         | tcaacagttccagaataaggacg   |
| TRBV 12         | aaaggagaagtctcagat        |
| TRBV 13.1       | caaggagaagtcccaat         |
| TRBV 13.2       | ggtgaggtacaactgcc         |
| TRBV 14         | gtctctcgaaaagagaagaggaat  |
| TRBV15          | agtgtctctcgacagggcacaggct |
| TRBV 16         | aaagagtctaacaggatgagctc   |
| TRBV 17         | cagatagtaaatgactttcag     |
| TRBV 18         | gatgagtcaggaatgccaaggaa   |
| TRBV 19         | caatgccccagaacgcaccctgc   |
| TRBV 20         | agctctgaggtgccccagaatctc  |
| TRBV 21         | gattcacagttgcctaagga      |
| TRBV 22         | cagagaagtctgaaatattcga    |
| TRBV 23         | gatcgattctcagctcaacag     |
| TRBV 24         | aaagatttaacaatgaagcagac   |
| TRBC            | ttctgatggctcaaaca         |
| TRBC1           | tgaccccaagcaaggagga       |
| GAPDH-Sense     | cgaccacttctcaagctca       |
| GAPDH-AntiSense | aggggtctacatggcaactg      |

Abbreviations: GAPDH, glyceraldehyde-3-phosphate dehydrogenase; TRBC1, TR beta chain constant 1; TRBV, T-cell receptor beta-chain variable.

The primers for TRBV family as previously described (Manfras BJ *et al. J Immunol Methods*, 1997, **210**: 235–249; Ikeda H *et al. Cancer Res*, 1993, **53**: 3078–3084) with a little modification.

**Supplemental Table 2 HLA-A and DRB1 haplotypes in study subjects**

| <i>Subjects</i> | <i>MHC class I haplotype</i> |         | <i>MHC class II haplotype</i> |            |
|-----------------|------------------------------|---------|-------------------------------|------------|
| 1               | A*11:01                      | A*21:02 | DRB1*03:01                    | DRB1*13:12 |
| 2               | A*02:01                      | A*24:02 | DRB1*04:05                    | DRB1*15:01 |
| 3               | A*01:01                      | A*02:07 | DRB1*12:01                    | DRB1*15:01 |
| 4               | A*11:01                      | A*11:53 | DRB1*08:03                    | DRB1*08:03 |
| 5               | A*11:01                      | A*11:01 | DRB1*04:06                    | DRB1*12:02 |
| 6               | A*02:01                      | A*02:07 | DRB1*10:01                    | DRB1*12:01 |
| 7               | A*02:01                      | A*02:03 | DRB1*11:01                    | DRB1*12:02 |
| 8               | A*03:01                      | A*23:02 | DRB1*03:01                    | DRB1*13:01 |
| 9               | A*02:07                      | A*24:02 | DRB1*09:01                    | DRB1*12:02 |
| 10              | A*02:07                      | A*24:02 | DRB1*14:54                    | DRB1*16:02 |
| 11              | A*02:07                      | A*24:02 | DRB1*14:05                    | DRB1*15:01 |
| 12              | A*02:03                      | A*11:13 | DRB1*12:02                    | DRB1*12:02 |
| 13              | A*02:01                      | A*02:03 | DRB1*11:01                    | DRB1*12:02 |
| 14              | A*11:01                      | A*24:02 | DRB1*08:03                    | DRB1*09:01 |
| 15              | A*02:01                      | A*11:01 | DRB1*08:03                    | DRB1*16:02 |
| 16              | A*11:01                      | A*11:01 | DRB1*09:01                    | DRB1*13:12 |
| 17              | A*02:07                      | A*02:07 | DRB1*09:01                    | DRB1*16:02 |
| 18              | A*02:07                      | A*33:03 | DRB1*07:01                    | DRB1*12:01 |
| 19              | A*11:01                      | A*11:01 | DRB1*09:01                    | DRB1*09:01 |
| 20              | A*01:01                      | A*24:02 | DRB1*04:03                    | DRB1*07:01 |
| 21              | A*01:01                      | A*11:01 | DRB1*04:03                    | DRB1*10:01 |
| 22              | A*11:01                      | A*11:53 | DRB1*08:03                    | DRB1*12:02 |
| 23              | A*02:01                      | A*11:01 | DRB1*12:01                    | DRB1*14:54 |
| 24              | A*11:01                      | A*24:02 | DRB1*04:03                    | DRB1*16:02 |
| 25              | A*02:07                      | A*24:02 | DRB1*09:01                    | DRB1*12:02 |
| 26              | A*02:07                      | A*24:02 | DRB1*14:05                    | DRB1*15:01 |
| 27              | A*02:07                      | A*11:01 | DRB1*04:04                    | DRB1*12:01 |
| 28              | A*02:07                      | A*02:07 | DRB1*09:01                    | DRB1*09:01 |
| 29              | A*11:01                      | A*24:02 | DRB1*08:09                    | DRB1*12:02 |
| 30              | A*02:07                      | A*11:01 | DRB1*04:04                    | DRB1*12:01 |

Abbreviation: MHC, major histocompatibility complex.
